# Supplementary material for: Cationic dinitrosyl iron complexes with thiourea exhibit selective toxicity to brain tumor cells in vitro
Source: Royal Society of Chemistry journal article supplement (doi:10.1039/d2dt01011a), 2022-01-01
Supplement: d2dt01011a1.pdf [file d2dt01011a1.pdf]

## Supporting Materials

### Cationic dinitrosyl iron complexes with thiourea exhibit selective toxicity to brain tumor cells *in vitro*

N.A. Sanina<sup>a,b,c\*</sup>, I.V. Sulimenkov<sup>d</sup>, N.S. Emel'yanova<sup>a</sup>, A.S. Konyukhova<sup>c</sup>, T.S. Stupina<sup>a</sup>, A.A. Balakina<sup>a</sup>, A.A. Terent'ev<sup>a,b,c</sup> and S.M. Aldoshin<sup>a</sup>

<sup>a</sup>Institute of Problems of Chemical Physics, The Russian Academy of Sciences, 142432, Chernogolovka, Russia

<sup>b</sup>Scientific and Educational Center "Medical Chemistry" of Moscow State Regional University, 141014, Mytishchi, Russia

<sup>c</sup>Faculty of Fundamental Physicochemical Engineering, Moscow State University, 119991, Moscow, Russia

<sup>d</sup>Chernogolovka Branch of N.N. Semenov Federal Research Center of Chemical Physics, The Russian Academy of Sciences, 142432, Chernogolovka, Russia

\*Corresponding author: [sanina@icp.ac.ru](mailto:sanina@icp.ac.ru) (Nataliya A. Sanina)

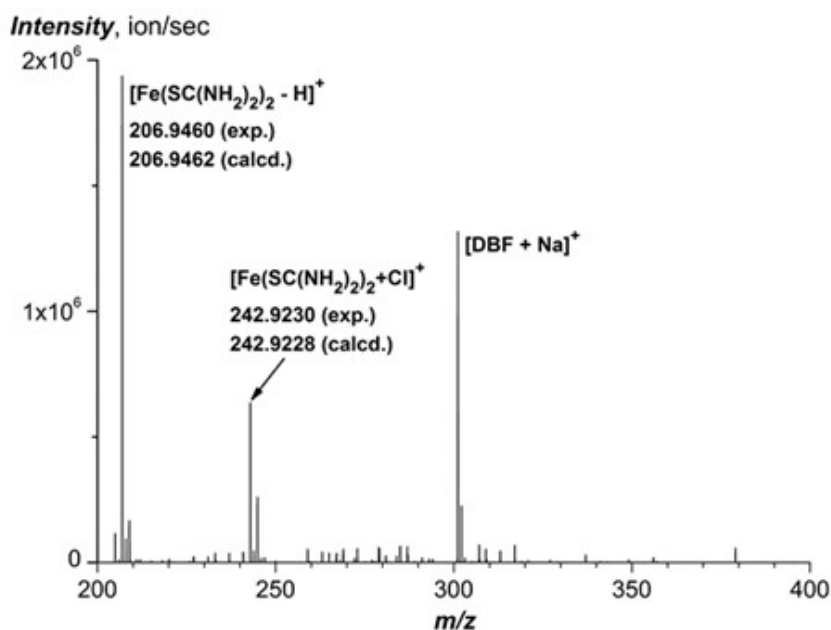

Figure S1. The ESI mass spectrum of MeOH solution of DNIC I (100 $\mu$ M). The  $[\text{DBF} + \text{Na}]^+$  ion appearance in the mass spectrum is related to a design feature of our home-build electrospray ion source.

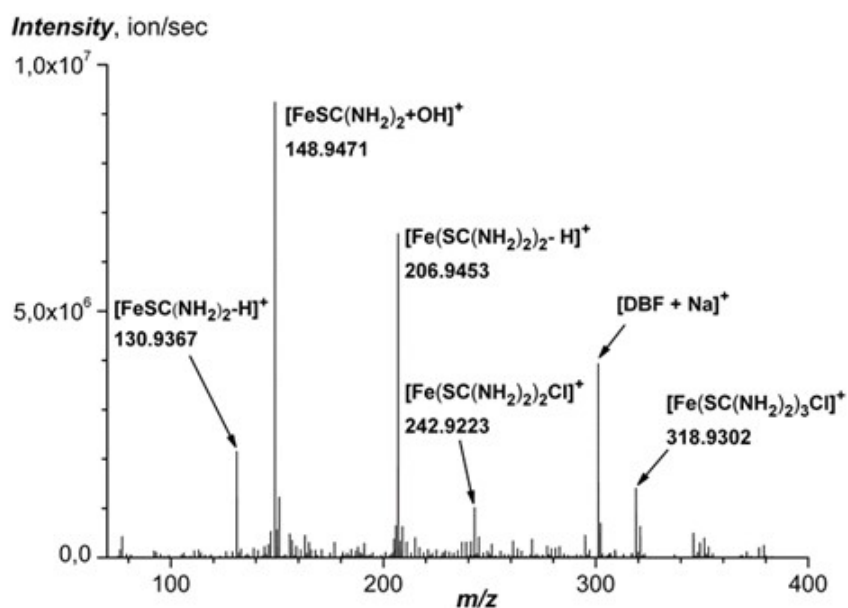

Figure S2 The ESI mass spectrum for MeOH solution (ca. 100  $\mu$ M) of DNIC **II**. The [DBF + Na]<sup>+</sup> ion appearance is a result of a design feature of our home-made electrospray ion source.

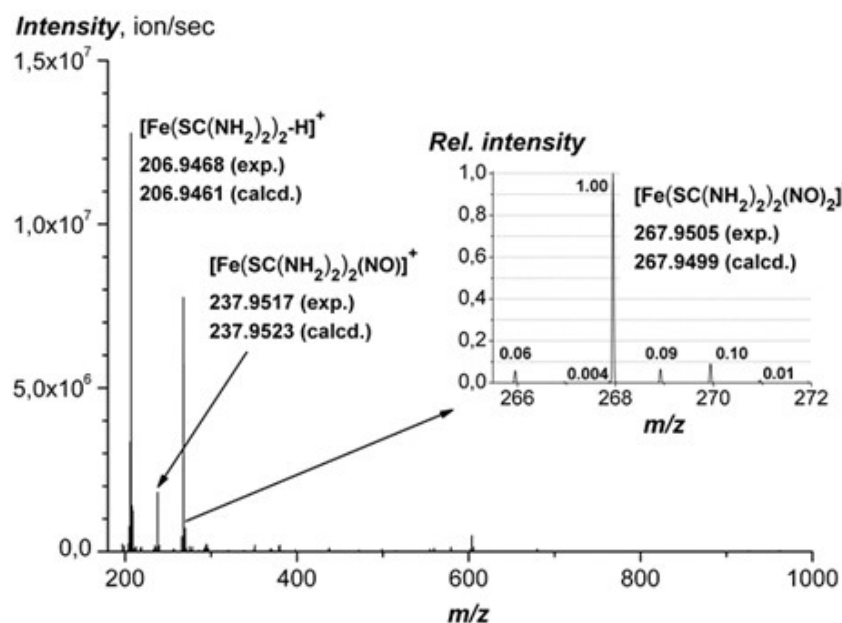

Figure S3. The ESI mass spectrum of a DNIC **III** solution in MeOH in the positive-ion mode (the concentration of complex **III** was 100  $\mu$ M). The spectrum is averaged over the first minute of acquisition, i.e. at the third minute after preparation of the solution. The accuracy of determination of *m/z* values < 5 ppm. The inset shows the detailed experimental isotopic distribution of one of the ions and the calculated isotopic distribution for this ion (the numerical values).

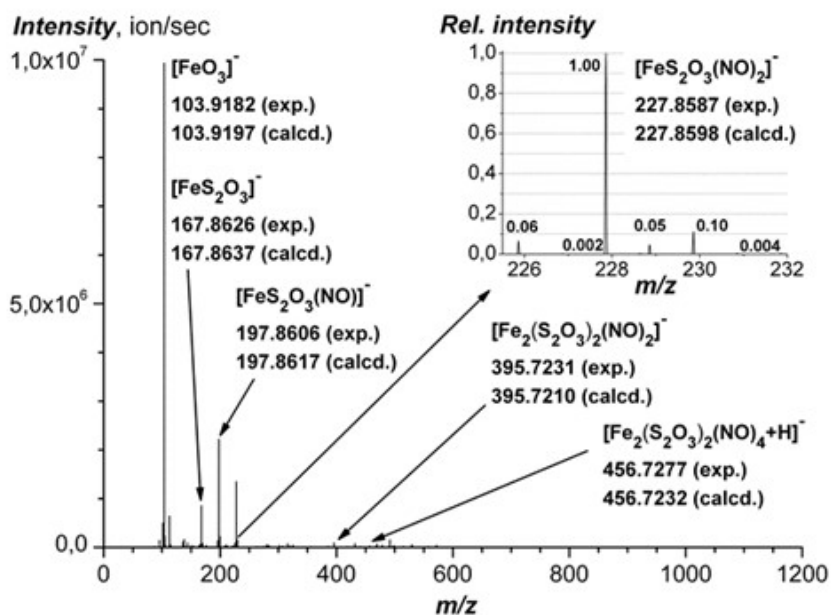

Figure S4. The ESI mass spectrum of a DNIC **III** in MeOH in the negative-ion mode (the concentration of complex **III** was 100  $\mu\text{M}$ ). The spectrum is averaged over the first minute of acquisition, i.e. at the third minute after preparation of the solution. The accuracy of determination of m/z values < 5 ppm. The inset shows the detailed experimental isotopic distribution of one of the ions and the calculated isotopic distribution for that ion (the numerical values).

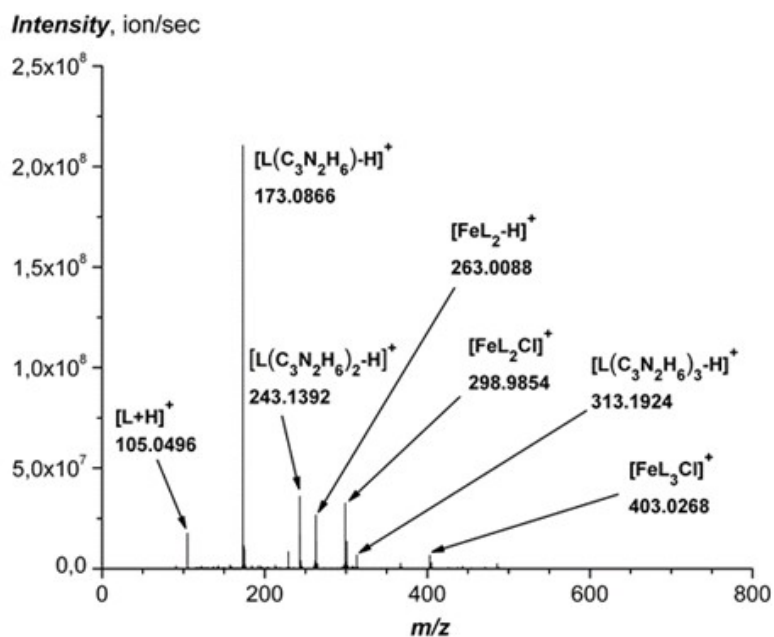

Figure S5. The ESI mass spectrum of MeOH of DNIC **IV** ( $\text{L} = \text{SC}_3\text{N}_2\text{H}_8$ , N'-ethylthiourea) in the positive-ion mode (the concentration of complex **IV** was 100  $\mu\text{M}$ ). The spectrum is averaged over the first minute of registration, i.e. at the third minute after preparation of the solution (the determination accuracy of m/z values < 5 ppm).

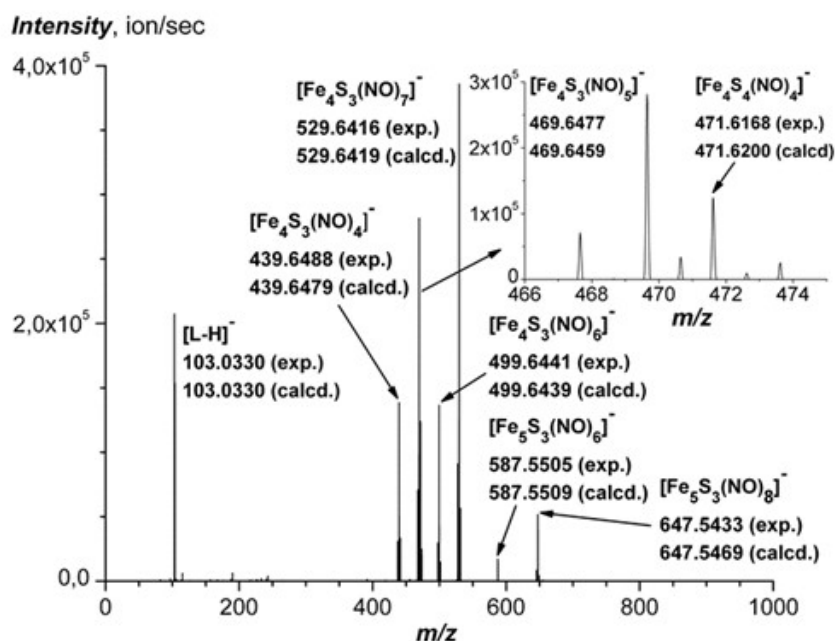

Figure S6. The ESI mass spectrum of MeOH of DNIC IV ( $L = SC_3N_2H_8$  is N'-ethylthiourea) in the negative-ion mode (the concentration of complex IV was 100  $\mu M$ ). The spectrum is averaged over the first minute of registration, i.e. at the third minute after preparation of the solution (the determination accuracy of  $m/z$  values < 5 ppm). The inset shows the detailed experimental isotopic distribution of one of the ions and the calculated isotopic distribution for that ion (the numerical values).

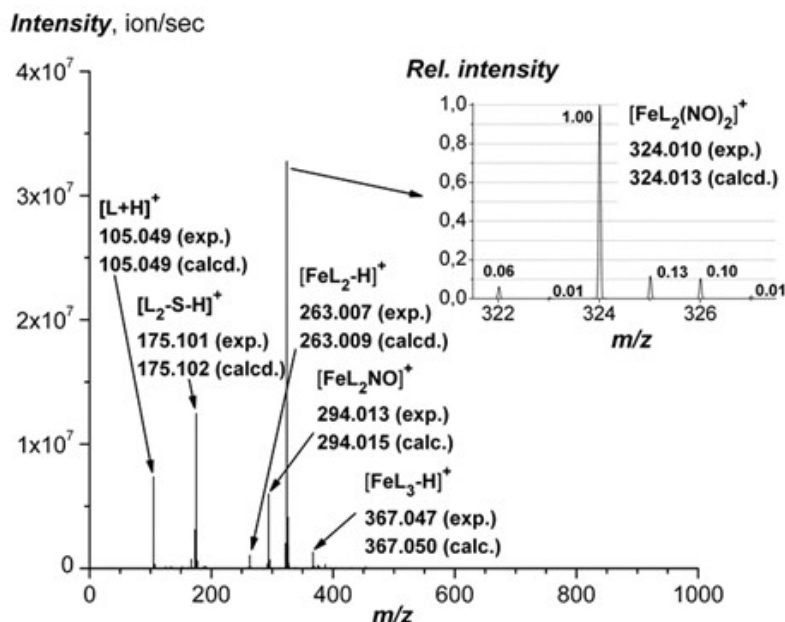

Figure S7. The ESI mass spectrum of MeOH of DNIC V ( $L = C_3H_8N_2S$  is dimethylthiourea) in the positive-ion mode (the concentration of complex V was 100  $\mu M$ ). The spectrum is averaged over the first minute of registration, i.e. at the third minute after preparation of the solution (the determination accuracy of  $m/z$  values < 5 ppm). The inset shows the detailed experimental isotopic

distribution of one of the ions and the calculated isotopic distribution for this ion (the numerical values).

## Quantum chemical calculations

1.Coordinates of optimized geometries of complexes

Complex IV

Figure 3

Complex 2

|    |              |              |              |
|----|--------------|--------------|--------------|
| 26 | 0.104400000  | 1.450834000  | -0.002559000 |
| 16 | 1.347315000  | 0.036729000  | -1.421919000 |
| 16 | -1.339775000 | 0.019744000  | 1.218316000  |
| 6  | -2.388338000 | -0.802932000 | 0.079301000  |
| 7  | -3.649274000 | -1.019430000 | 0.441948000  |
| 1  | -3.936077000 | -0.620090000 | 1.329028000  |
| 6  | -4.647697000 | -1.765955000 | -0.341491000 |
| 1  | -4.238510000 | -2.756715000 | -0.569502000 |
| 1  | -4.824571000 | -1.237756000 | -1.285905000 |
| 7  | -1.938777000 | -1.251406000 | -1.091667000 |
| 1  | -2.547236000 | -1.695914000 | -1.769676000 |
| 1  | -0.968607000 | -1.101637000 | -1.358153000 |
| 6  | 2.272487000  | -1.039005000 | -0.393169000 |
| 7  | -0.614928000 | 2.607382000  | -1.004680000 |
| 8  | -0.931664000 | 3.625738000  | -1.507127000 |
| 7  | 3.435269000  | -1.483991000 | -0.863592000 |
| 1  | 3.744839000  | -1.066346000 | -1.734108000 |
| 7  | 1.812759000  | -1.432697000 | 0.793945000  |
| 1  | 2.337237000  | -2.049123000 | 1.403658000  |
| 1  | 0.869419000  | -1.180722000 | 1.083764000  |
| 8  | 1.658367000  | 2.826310000  | 1.940633000  |
| 7  | 1.064607000  | 2.103122000  | 1.225716000  |
| 6  | 4.337959000  | -2.447237000 | -0.212203000 |
| 1  | 4.876550000  | -2.948663000 | -1.018718000 |
| 1  | 3.727662000  | -3.208237000 | 0.283953000  |
| 6  | -5.945363000 | -1.893150000 | 0.449527000  |
| 1  | -6.673974000 | -2.451466000 | -0.143843000 |
| 1  | -6.368094000 | -0.908194000 | 0.671866000  |
| 1  | -5.780694000 | -2.430872000 | 1.388415000  |
| 6  | 5.315649000  | -1.781656000 | 0.760476000  |
| 1  | 5.965800000  | -2.545622000 | 1.198052000  |
| 1  | 4.791047000  | -1.269583000 | 1.573317000  |
| 1  | 5.940757000  | -1.051957000 | 0.237636000  |

Complex 3

|    |              |              |              |
|----|--------------|--------------|--------------|
| 26 | 1.283862000  | -0.187943000 | -0.021338000 |
| 16 | 0.027270000  | 1.717881000  | -0.630940000 |
| 17 | 0.440884000  | -1.883362000 | -1.351922000 |
| 6  | -1.622889000 | 1.322654000  | -0.227221000 |
| 7  | -2.058283000 | 0.066091000  | -0.178212000 |
| 1  | -1.411701000 | -0.656589000 | -0.501038000 |

|   |              |              |              |
|---|--------------|--------------|--------------|
| 7 | 2.897335000  | 0.282534000  | -0.287194000 |
| 7 | -2.466322000 | 2.329849000  | 0.022260000  |
| 1 | -3.466856000 | 2.193509000  | 0.101189000  |
| 1 | -2.123379000 | 3.281027000  | 0.016124000  |
| 6 | -3.424812000 | -0.342448000 | 0.183224000  |
| 1 | -4.116523000 | -0.043715000 | -0.614362000 |
| 1 | -3.707966000 | 0.185458000  | 1.100684000  |
| 8 | 4.003761000  | 0.635229000  | -0.066187000 |
| 7 | 0.945048000  | -0.489797000 | 1.613330000  |
| 6 | -3.478879000 | -1.851477000 | 0.401080000  |
| 1 | -4.498953000 | -2.141498000 | 0.666819000  |
| 1 | -2.809592000 | -2.152619000 | 1.212792000  |
| 1 | -3.196153000 | -2.390091000 | -0.509055000 |
| 8 | 0.990541000  | -0.504107000 | 2.794380000  |

#### Complex 4

|    |              |              |              |
|----|--------------|--------------|--------------|
| 26 | -1.419561000 | -0.102660000 | -0.138273000 |
| 16 | 0.584697000  | -1.213911000 | -0.597333000 |
| 8  | -2.039986000 | 0.227914000  | 2.604370000  |
| 8  | -3.352630000 | -2.146821000 | -0.526278000 |
| 7  | -1.624116000 | 0.323031000  | 1.503722000  |
| 7  | -2.561122000 | -1.279046000 | -0.589988000 |
| 7  | 1.780970000  | 0.547051000  | 1.082413000  |
| 1  | 0.856341000  | 0.790026000  | 1.411582000  |
| 7  | 3.155517000  | -0.818726000 | -0.184532000 |
| 6  | 1.936451000  | -0.414469000 | 0.171172000  |
| 1  | 3.190538000  | -1.511830000 | -0.923676000 |
| 1  | 2.564212000  | 1.003804000  | 1.533827000  |
| 6  | 4.437953000  | -0.281777000 | 0.298986000  |
| 1  | 4.347165000  | -0.074377000 | 1.369827000  |
| 1  | 5.161849000  | -1.092576000 | 0.196994000  |
| 6  | 4.892816000  | 0.954166000  | -0.482227000 |
| 1  | 4.169393000  | 1.771201000  | -0.398399000 |
| 1  | 5.021882000  | 0.712498000  | -1.541348000 |
| 1  | 5.852035000  | 1.301673000  | -0.085927000 |
| 6  | -2.193367000 | 2.857124000  | -0.732300000 |
| 1  | -3.264272000 | 2.690798000  | -0.864102000 |
| 1  | -1.953821000 | 3.000978000  | 0.319388000  |
| 1  | -1.857314000 | 3.713494000  | -1.318090000 |
| 8  | -1.446584000 | 1.681052000  | -1.157772000 |
| 1  | -1.522830000 | 1.592467000  | -2.125293000 |

#### Complex 5

|    |              |              |              |
|----|--------------|--------------|--------------|
| 26 | -0.140306000 | 0.042855000  | -0.024025000 |
| 17 | 0.146592000  | 2.215613000  | 0.616409000  |
| 7  | -1.428230000 | -0.125259000 | -1.138008000 |
| 8  | -2.469833000 | -0.445863000 | -1.594560000 |
| 7  | -0.323385000 | -1.030122000 | 1.299347000  |
| 8  | -0.841412000 | -1.808683000 | 2.023221000  |
| 8  | 1.511409000  | -0.574149000 | -1.075854000 |
| 6  | 2.808621000  | -0.853111000 | -0.479187000 |
| 1  | 3.311087000  | 0.078342000  | -0.210270000 |

|   |             |              |              |
|---|-------------|--------------|--------------|
| 1 | 2.606035000 | -1.447027000 | 0.410337000  |
| 1 | 3.405969000 | -1.427120000 | -1.189024000 |
| 1 | 1.641082000 | -0.147944000 | -1.942048000 |

Complex 6

|    |              |              |              |
|----|--------------|--------------|--------------|
| 26 | -0.015635000 | 0.121330000  | -0.185395000 |
| 7  | 0.103793000  | 0.070988000  | 1.529080000  |
| 8  | 0.284795000  | 0.490752000  | 2.615188000  |
| 7  | 0.285321000  | 1.722967000  | -0.719807000 |
| 8  | 0.544948000  | 2.869458000  | -0.650198000 |
| 8  | 1.505819000  | -1.020640000 | -0.917439000 |
| 1  | 2.092763000  | -0.611836000 | -1.577976000 |
| 6  | 2.237446000  | -2.035768000 | -0.172915000 |
| 1  | 3.002462000  | -1.563174000 | 0.445966000  |
| 1  | 1.502378000  | -2.545139000 | 0.446331000  |
| 1  | 2.684145000  | -2.735366000 | -0.880333000 |
| 8  | -1.990225000 | -0.232427000 | -0.599993000 |
| 1  | -2.276713000 | -0.032483000 | -1.509389000 |
| 6  | -2.773803000 | -1.344629000 | -0.080460000 |
| 1  | -2.527111000 | -2.262839000 | -0.616857000 |
| 1  | -2.507295000 | -1.432361000 | 0.971180000  |
| 1  | -3.832464000 | -1.103828000 | -0.183768000 |

**Figure 4**

TS1

|    |              |              |              |
|----|--------------|--------------|--------------|
| 26 | -2.514881000 | -0.006321000 | 0.251508000  |
| 16 | -0.854452000 | 1.350677000  | -0.480017000 |
| 7  | -3.898955000 | 0.939423000  | 0.509131000  |
| 8  | -4.748026000 | 1.556510000  | 1.035847000  |
| 7  | -2.072902000 | -0.994560000 | 1.548362000  |
| 8  | -1.903304000 | -1.403555000 | 2.642995000  |
| 6  | 2.371536000  | -1.728376000 | -0.428205000 |
| 16 | 0.833748000  | -1.049813000 | -0.938894000 |
| 6  | 0.795947000  | 0.695110000  | 0.028939000  |
| 7  | 2.473122000  | -3.063592000 | -0.364658000 |
| 1  | 3.361447000  | -3.531826000 | -0.233073000 |
| 1  | 1.657570000  | -3.640077000 | -0.524483000 |
| 7  | 3.387174000  | -0.941560000 | -0.122153000 |
| 6  | 4.672011000  | -1.397348000 | 0.432623000  |
| 1  | 5.222627000  | -1.944009000 | -0.344065000 |
| 1  | 4.466714000  | -2.087207000 | 1.260797000  |
| 6  | 5.491969000  | -0.206554000 | 0.920790000  |
| 1  | 6.444549000  | -0.560918000 | 1.322906000  |
| 1  | 4.966864000  | 0.332415000  | 1.715490000  |
| 1  | 5.708160000  | 0.486393000  | 0.101330000  |
| 7  | 1.010500000  | 0.480329000  | 1.399335000  |
| 1  | 1.686285000  | 1.106603000  | 1.822803000  |
| 7  | 1.908020000  | 1.438682000  | -0.541385000 |
| 6  | 2.057930000  | 2.845690000  | -0.062252000 |
| 1  | 1.083594000  | 3.348956000  | -0.044156000 |
| 1  | 2.448584000  | 2.824222000  | 0.960798000  |

|   |              |              |              |
|---|--------------|--------------|--------------|
| 1 | 4.010468000  | 3.087323000  | -0.996088000 |
| 6 | 3.036181000  | 3.586702000  | -0.968821000 |
| 1 | 2.651115000  | 3.655314000  | -1.992647000 |
| 1 | 3.183068000  | 4.605912000  | -0.600474000 |
| 1 | 0.164508000  | 0.408009000  | 1.952096000  |
| 1 | 3.194033000  | 0.072697000  | -0.245698000 |
| 1 | 1.764737000  | 1.463720000  | -1.553458000 |
| 8 | -2.835672000 | -1.080863000 | -1.513220000 |
| 6 | -4.144886000 | -1.515484000 | -1.974446000 |
| 1 | -4.579456000 | -2.082564000 | -1.152684000 |
| 1 | -4.773664000 | -0.653949000 | -2.214329000 |
| 1 | -4.020986000 | -2.161845000 | -2.845699000 |
| 1 | -2.358868000 | -0.644877000 | -2.243169000 |

Complex 7

|    |              |              |              |
|----|--------------|--------------|--------------|
| 26 | -2.608474000 | 0.102901000  | 0.031349000  |
| 16 | -0.847529000 | 1.249611000  | -0.838689000 |
| 7  | -3.941068000 | 1.132379000  | -0.165574000 |
| 8  | -4.765898000 | 1.951844000  | 0.041525000  |
| 7  | -2.387054000 | -0.366841000 | 1.651801000  |
| 8  | -2.479619000 | -0.317616000 | 2.832039000  |
| 6  | 2.455666000  | -1.710440000 | -0.343526000 |
| 16 | 0.886687000  | -1.099224000 | -0.922335000 |
| 6  | 0.778682000  | 0.596796000  | -0.128640000 |
| 7  | 2.574469000  | -3.034467000 | -0.243248000 |
| 1  | 3.471928000  | -3.483352000 | -0.100448000 |
| 1  | 1.774462000  | -3.637509000 | -0.387099000 |
| 7  | 3.439137000  | -0.881789000 | -0.068905000 |
| 6  | 4.735038000  | -1.276654000 | 0.507630000  |
| 1  | 5.327393000  | -1.784068000 | -0.262909000 |
| 1  | 4.547496000  | -1.986862000 | 1.321059000  |
| 6  | 5.472097000  | -0.048109000 | 1.031178000  |
| 1  | 6.426925000  | -0.359090000 | 1.463432000  |
| 1  | 4.887817000  | 0.455664000  | 1.807159000  |
| 1  | 5.677651000  | 0.661370000  | 0.223376000  |
| 7  | 0.871504000  | 0.440540000  | 1.294316000  |
| 1  | 0.684907000  | 1.335514000  | 1.751091000  |
| 7  | 1.898310000  | 1.395285000  | -0.602993000 |
| 6  | 2.063328000  | 2.721309000  | 0.042990000  |
| 1  | 1.110190000  | 3.268502000  | 0.059739000  |
| 1  | 2.382922000  | 2.550781000  | 1.075122000  |
| 1  | 4.081796000  | 2.991685000  | -0.716606000 |
| 6  | 3.125489000  | 3.524659000  | -0.702358000 |
| 1  | 2.819924000  | 3.718699000  | -1.736861000 |
| 1  | 3.273856000  | 4.489373000  | -0.207816000 |
| 1  | 0.152496000  | -0.205373000 | 1.617271000  |
| 1  | 3.207326000  | 0.120894000  | -0.229719000 |
| 1  | 1.786176000  | 1.526886000  | -1.610500000 |
| 8  | -2.800036000 | -1.628237000 | -1.082415000 |
| 6  | -3.283906000 | -2.892562000 | -0.551590000 |
| 1  | -2.742429000 | -3.053791000 | 0.378763000  |



|   |              |              |              |
|---|--------------|--------------|--------------|
| 1 | -4.358631000 | -2.839774000 | -0.364059000 |
| 1 | -3.053715000 | -3.685532000 | -1.264817000 |
| 1 | -3.165731000 | -1.499306000 | -1.975933000 |

TS2

|    |              |              |              |
|----|--------------|--------------|--------------|
| 26 | -2.886555000 | 0.090374000  | 0.012221000  |
| 16 | -1.206296000 | 1.306256000  | -0.921161000 |
| 7  | -4.267189000 | 1.062333000  | -0.141258000 |
| 8  | -5.118087000 | 1.847378000  | 0.092054000  |
| 7  | -2.589977000 | -0.363061000 | 1.625288000  |
| 8  | -2.643862000 | -0.312935000 | 2.807886000  |
| 6  | 2.773316000  | -1.698122000 | -0.321501000 |
| 16 | 1.161068000  | -1.155514000 | -0.847365000 |
| 6  | 1.009314000  | 0.537724000  | -0.054889000 |
| 7  | 2.950992000  | -3.015592000 | -0.221896000 |
| 1  | 3.870891000  | -3.425915000 | -0.109005000 |
| 1  | 2.172538000  | -3.652189000 | -0.336429000 |
| 7  | 3.729989000  | -0.827900000 | -0.083210000 |
| 6  | 5.060399000  | -1.165794000 | 0.449247000  |
| 1  | 5.646673000  | -1.651100000 | -0.339957000 |
| 1  | 4.930945000  | -1.879904000 | 1.270540000  |
| 6  | 5.762797000  | 0.094667000  | 0.943774000  |
| 1  | 6.744149000  | -0.174290000 | 1.343599000  |
| 1  | 5.184925000  | 0.576696000  | 1.738148000  |
| 1  | 5.910460000  | 0.808826000  | 0.127484000  |
| 7  | 1.157524000  | 0.391305000  | 1.364418000  |
| 1  | 0.949338000  | 1.279538000  | 1.825005000  |
| 7  | 2.077439000  | 1.380453000  | -0.569747000 |
| 6  | 2.208760000  | 2.714852000  | 0.066650000  |
| 1  | 1.234626000  | 3.221715000  | 0.114877000  |
| 1  | 2.570558000  | 2.562074000  | 1.087570000  |
| 1  | 4.186760000  | 3.066410000  | -0.762942000 |
| 6  | 3.209974000  | 3.558925000  | -0.717068000 |
| 1  | 2.861115000  | 3.735772000  | -1.740904000 |
| 1  | 3.334629000  | 4.531017000  | -0.230493000 |
| 1  | 0.477812000  | -0.282826000 | 1.713724000  |
| 1  | 3.450883000  | 0.163531000  | -0.238562000 |
| 1  | 1.925277000  | 1.503127000  | -1.573121000 |
| 8  | -3.043465000 | -1.651801000 | -1.089690000 |
| 6  | -3.455265000 | -2.933101000 | -0.539131000 |
| 1  | -2.875803000 | -3.067713000 | 0.372380000  |
| 1  | -4.524169000 | -2.924599000 | -0.314720000 |
| 1  | -3.216657000 | -3.718643000 | -1.257792000 |
| 1  | -3.444780000 | -1.541948000 | -1.970377000 |

Complex 8

|    |              |              |              |
|----|--------------|--------------|--------------|
| 26 | 0.158268000  | -0.014907000 | -0.036461000 |
| 16 | 0.320062000  | -1.835401000 | -1.200469000 |
| 7  | 1.469981000  | 0.175265000  | 1.036651000  |
| 8  | 2.565075000  | 0.010386000  | 1.495214000  |
| 7  | -0.186388000 | 1.463280000  | -0.934862000 |

|   |              |              |              |
|---|--------------|--------------|--------------|
| 8 | 0.243417000  | 2.569681000  | -1.168579000 |
| 8 | -1.550626000 | -0.125347000 | 1.225900000  |
| 6 | -2.870198000 | -0.059413000 | 0.630851000  |
| 1 | -2.886216000 | 0.858809000  | 0.045303000  |
| 1 | -3.043403000 | -0.921318000 | -0.019165000 |
| 1 | -3.623171000 | -0.016249000 | 1.421108000  |
| 1 | -1.510062000 | -0.918357000 | 1.790335000  |

Complex 9

|    |              |              |              |
|----|--------------|--------------|--------------|
| 16 | -0.024367000 | -1.624626000 | -0.449329000 |
| 6  | 1.586793000  | -0.884988000 | -0.199897000 |
| 7  | 1.794452000  | 0.387748000  | -0.467148000 |
| 1  | 1.070042000  | 0.892530000  | -0.970559000 |
| 7  | 2.532015000  | -1.712886000 | 0.211441000  |
| 1  | 3.517197000  | -1.468173000 | 0.173059000  |
| 1  | 2.301238000  | -2.639172000 | 0.553433000  |
| 6  | 3.050347000  | 1.122465000  | -0.183492000 |
| 1  | 3.757219000  | 0.922569000  | -0.995069000 |
| 1  | 3.457901000  | 0.721209000  | 0.748555000  |
| 6  | 2.762695000  | 2.613816000  | -0.050710000 |
| 1  | 3.701602000  | 3.131728000  | 0.161240000  |
| 1  | 2.064993000  | 2.807510000  | 0.768649000  |
| 1  | 2.352031000  | 3.022714000  | -0.979102000 |
| 6  | -1.056933000 | -0.426997000 | 0.387608000  |
| 7  | -0.796033000 | -0.079010000 | 1.636534000  |
| 1  | -1.318742000 | 0.656325000  | 2.103626000  |
| 1  | -0.110254000 | -0.574723000 | 2.193988000  |
| 7  | -2.107129000 | 0.002857000  | -0.280448000 |
| 1  | -2.146455000 | -0.202903000 | -1.275646000 |
| 6  | -3.210074000 | 0.802066000  | 0.302282000  |
| 1  | -2.848552000 | 1.824619000  | 0.450576000  |
| 1  | -3.450174000 | 0.365339000  | 1.276815000  |
| 6  | -4.421498000 | 0.775073000  | -0.621841000 |
| 1  | -5.218462000 | 1.369511000  | -0.168267000 |
| 1  | -4.184421000 | 1.211532000  | -1.596878000 |
| 1  | -4.786415000 | -0.246175000 | -0.761511000 |

**Figure 5**

TS3

|    |              |              |              |
|----|--------------|--------------|--------------|
| 26 | -2.131595000 | -0.103457000 | -0.377912000 |
| 16 | -0.351065000 | 0.591094000  | -1.327005000 |
| 7  | -3.605050000 | -0.032926000 | -1.166557000 |
| 8  | -4.555680000 | -0.037575000 | -1.914767000 |
| 7  | -1.979706000 | -1.458835000 | 0.663934000  |
| 8  | -2.461079000 | -2.511154000 | 1.003543000  |
| 8  | -1.978580000 | 1.221925000  | 1.438247000  |
| 6  | -3.020807000 | 1.008844000  | 2.390866000  |
| 1  | -3.955130000 | 1.232265000  | 1.872490000  |
| 1  | -3.041791000 | -0.031783000 | 2.733618000  |
| 1  | -2.910220000 | 1.683623000  | 3.252269000  |
| 1  | -1.153625000 | 0.813166000  | 1.767383000  |

|    |             |              |              |
|----|-------------|--------------|--------------|
| 6  | 0.784639000 | 3.173749000  | 0.327712000  |
| 1  | 0.207303000 | 2.934192000  | 1.232317000  |
| 1  | 1.063705000 | 4.243112000  | 0.350664000  |
| 1  | 0.156249000 | 2.955268000  | -0.536818000 |
| 8  | 1.931206000 | 2.339860000  | 0.190193000  |
| 1  | 2.474976000 | 2.356029000  | 0.998680000  |
| 26 | 1.955423000 | -0.168143000 | -0.142297000 |
| 7  | 2.662674000 | -0.504031000 | -1.644945000 |
| 8  | 3.795670000 | -0.633806000 | -2.080761000 |
| 7  | 3.270736000 | 0.083961000  | 0.821311000  |
| 8  | 4.162001000 | -0.402673000 | 1.485757000  |
| 16 | 1.324010000 | -1.881696000 | 0.942596000  |

Complex 10

|    |              |              |              |
|----|--------------|--------------|--------------|
| 26 | -1.763071000 | -0.116742000 | -0.248223000 |
| 16 | 0.007606000  | -0.705685000 | -1.463682000 |
| 7  | -3.232818000 | -0.205412000 | -1.153141000 |
| 8  | -4.299659000 | -0.716067000 | -1.358692000 |
| 7  | -1.854161000 | -1.049109000 | 1.169186000  |
| 8  | -1.883914000 | -1.986907000 | 1.906291000  |
| 8  | -1.381907000 | 1.831236000  | 0.205692000  |
| 6  | -2.024269000 | 2.465639000  | 1.325630000  |
| 1  | -3.101487000 | 2.414401000  | 1.159188000  |
| 1  | -1.771704000 | 1.959191000  | 2.263933000  |
| 1  | -1.711908000 | 3.512905000  | 1.376626000  |
| 1  | -0.346754000 | 1.954139000  | 0.309978000  |
| 26 | 1.787863000  | -0.096494000 | -0.063250000 |
| 7  | 1.825749000  | -1.163049000 | 1.342769000  |
| 8  | 2.546416000  | -1.979009000 | 1.881072000  |
| 7  | 3.205162000  | -0.239276000 | -0.983261000 |
| 8  | 4.160318000  | 0.051560000  | -1.647628000 |
| 16 | 1.598352000  | 2.074503000  | 0.495685000  |

TS4

|    |              |              |              |
|----|--------------|--------------|--------------|
| 26 | -1.151653000 | 0.164490000  | 0.376550000  |
| 16 | 0.475032000  | 0.514431000  | 1.797963000  |
| 7  | -2.709620000 | 0.296106000  | 1.217826000  |
| 8  | -3.705526000 | 0.995394000  | 1.288721000  |
| 7  | -1.172712000 | 1.350850000  | -0.846430000 |
| 8  | -1.150532000 | 2.440690000  | -1.341777000 |
| 8  | -2.581919000 | -1.783278000 | -0.475728000 |
| 6  | -3.713722000 | -1.339409000 | -1.200165000 |
| 1  | -4.370158000 | -0.857156000 | -0.470950000 |
| 1  | -3.448981000 | -0.607528000 | -1.977129000 |
| 1  | -4.247096000 | -2.183256000 | -1.671432000 |
| 1  | -1.913964000 | -2.197666000 | -1.081819000 |
| 26 | 1.726877000  | -0.184703000 | -0.033701000 |
| 7  | 1.865070000  | 1.177514000  | -1.166554000 |
| 8  | 2.724197000  | 1.910097000  | -1.622625000 |
| 7  | 3.283600000  | -0.550246000 | 0.548058000  |
| 8  | 4.300245000  | -1.084341000 | 0.914540000  |
| 16 | 0.509383000  | -1.848211000 | -0.853408000 |

Complex11

|    |              |              |              |
|----|--------------|--------------|--------------|
| 26 | -1.397108000 | 0.044483000  | -0.000028000 |
| 16 | -0.000092000 | -0.161164000 | 1.795555000  |
| 8  | -3.302721000 | 2.114859000  | -0.000636000 |
| 7  | -2.219709000 | 1.577066000  | -0.000579000 |
| 26 | 1.397087000  | 0.044491000  | 0.000076000  |
| 16 | 0.000065000  | -0.162744000 | -1.795331000 |
| 7  | 2.219701000  | 1.576957000  | -0.000359000 |
| 8  | 3.302606000  | 2.114945000  | -0.000372000 |
| 7  | 2.477981000  | -1.236763000 | 0.000301000  |
| 8  | 3.137507000  | -2.233176000 | 0.000153000  |
| 7  | -2.478050000 | -1.236759000 | 0.000335000  |
| 8  | -3.137204000 | -2.233416000 | 0.000516000  |

**Figure 6**

TS5

|    |              |              |              |
|----|--------------|--------------|--------------|
| 26 | -1.866698000 | -1.292148000 | -0.302531000 |
| 8  | -1.800947000 | -3.513610000 | 1.308099000  |
| 7  | -1.771793000 | -2.358910000 | 0.943978000  |
| 26 | -1.952750000 | 1.199951000  | 0.357846000  |
| 16 | -3.714736000 | -0.070995000 | -0.107816000 |
| 7  | -1.924482000 | 1.511411000  | 1.974086000  |
| 8  | -2.057916000 | 2.340031000  | 2.848460000  |
| 7  | -2.156414000 | 2.548152000  | -0.486350000 |
| 8  | -2.388292000 | 3.542451000  | -1.126813000 |
| 7  | -1.990965000 | -2.070193000 | -1.699607000 |
| 8  | -2.130078000 | -2.692618000 | -2.721576000 |
| 26 | 2.827287000  | -0.139602000 | 0.348291000  |
| 16 | 4.161230000  | 1.577430000  | 0.520940000  |
| 7  | 2.433011000  | -0.943286000 | 1.860289000  |
| 8  | 2.728201000  | -1.869741000 | 2.582513000  |
| 7  | 3.593832000  | -1.299837000 | -0.649286000 |
| 8  | 4.558626000  | -1.898480000 | -1.059332000 |
| 8  | 2.732382000  | 1.054797000  | -2.204977000 |
| 1  | 3.462907000  | 1.214967000  | -1.540734000 |
| 6  | 1.985211000  | 2.264021000  | -2.234324000 |
| 1  | 0.916886000  | 2.018042000  | -2.251530000 |
| 1  | 2.179390000  | 2.862197000  | -1.334025000 |
| 1  | 2.239475000  | 2.874604000  | -3.125885000 |
| 16 | -0.154738000 | 0.122241000  | -0.378647000 |

Complex 12

|    |              |              |              |
|----|--------------|--------------|--------------|
| 26 | -1.376664000 | -1.389804000 | 0.103439000  |
| 16 | 0.081308000  | -0.057404000 | -1.105562000 |
| 8  | 0.109075000  | -3.398650000 | 1.496152000  |
| 7  | -0.509515000 | -2.562834000 | 0.916186000  |
| 26 | -1.322166000 | 1.404629000  | 0.012662000  |

|    |              |              |              |
|----|--------------|--------------|--------------|
| 16 | -2.283035000 | 0.078200000  | 1.598762000  |
| 7  | -0.434956000 | 2.669378000  | 0.748422000  |
| 8  | -0.172049000 | 3.821840000  | 0.953741000  |
| 7  | -2.513722000 | 1.970414000  | -1.029762000 |
| 8  | -3.436238000 | 2.434724000  | -1.628059000 |
| 7  | -2.546200000 | -2.055139000 | -0.964188000 |
| 8  | -3.078063000 | -3.012005000 | -1.461869000 |
| 8  | 2.333815000  | 0.615720000  | 2.556888000  |
| 7  | 2.116533000  | -0.100188000 | 1.598766000  |
| 26 | 2.299731000  | -0.084650000 | -0.159765000 |
| 7  | 3.005689000  | 1.374071000  | -0.690063000 |
| 8  | 3.765480000  | 2.079261000  | -1.299569000 |
| 16 | 3.475202000  | -1.744645000 | -0.984359000 |

TS6

|    |              |              |              |
|----|--------------|--------------|--------------|
| 26 | -2.459472000 | -0.947496000 | 0.217074000  |
| 16 | -0.592076000 | -0.670546000 | -1.126811000 |
| 8  | -2.918511000 | -3.115391000 | 1.957205000  |
| 7  | -2.341256000 | -2.135446000 | 1.514562000  |
| 26 | -0.418169000 | 1.669316000  | -0.044283000 |
| 16 | -2.581033000 | 1.166391000  | 0.938259000  |
| 7  | 0.059090000  | 2.692285000  | 1.316490000  |
| 8  | 0.096753000  | 3.862526000  | 1.630348000  |
| 7  | -0.799712000 | 2.760785000  | -1.317445000 |
| 8  | -1.322174000 | 3.663616000  | -1.916751000 |
| 7  | -3.832984000 | -1.293785000 | -0.729497000 |
| 8  | -4.864110000 | -1.171232000 | -1.350236000 |
| 8  | 3.256588000  | -2.877298000 | -1.932742000 |
| 7  | 2.526506000  | -1.904883000 | -1.802656000 |
| 26 | 1.646961000  | -1.015776000 | -0.543838000 |
| 7  | 1.910580000  | -1.784006000 | 0.946956000  |
| 8  | 2.194662000  | -1.957613000 | 2.104587000  |
| 16 | 2.229314000  | 1.119669000  | -0.394839000 |

Complex 13

|    |              |              |              |
|----|--------------|--------------|--------------|
| 26 | 2.014893000  | -0.552168000 | 0.005937000  |
| 26 | -0.296341000 | 1.738823000  | -0.110329000 |
| 16 | 0.121110000  | -0.354367000 | 1.322556000  |
| 16 | 1.805314000  | 1.327436000  | -1.212309000 |
| 8  | 1.827347000  | -2.610936000 | -1.962869000 |
| 8  | 4.455832000  | -1.164485000 | 1.252174000  |
| 8  | 1.058889000  | 2.634836000  | 2.232597000  |
| 7  | 3.439803000  | -0.544622000 | 1.021339000  |
| 7  | 1.986164000  | -1.891622000 | -1.017289000 |
| 7  | 0.403734000  | 2.571095000  | 1.222213000  |
| 16 | -1.544536000 | 0.289085000  | -1.509680000 |
| 26 | -1.766833000 | -1.078078000 | 0.264919000  |
| 7  | -1.716382000 | -2.678291000 | -0.243953000 |
| 8  | -1.537271000 | -3.734331000 | -0.778880000 |
| 7  | -3.141640000 | -0.727033000 | 1.276683000  |
| 8  | -4.127757000 | -1.205372000 | 1.793475000  |
| 7  | -1.321786000 | 3.015817000  | -0.693794000 |

|   |              |             |              |
|---|--------------|-------------|--------------|
| 8 | -1.977561000 | 3.425928000 | -1.628891000 |
|---|--------------|-------------|--------------|

TS7

|    |              |              |              |
|----|--------------|--------------|--------------|
| 26 | 1.890984000  | -1.207458000 | 0.055321000  |
| 16 | -0.099946000 | -0.755430000 | 1.208513000  |
| 8  | 2.295236000  | -3.371561000 | -1.695535000 |
| 7  | 1.791736000  | -2.361919000 | -1.233716000 |
| 26 | 0.183217000  | 1.394592000  | 0.020771000  |
| 16 | 2.302036000  | 0.873014000  | -0.636475000 |
| 7  | 0.391726000  | 3.832801000  | -1.568840000 |
| 8  | 0.459561000  | 4.962428000  | -1.128427000 |
| 7  | 0.287798000  | 2.733324000  | 0.924223000  |
| 8  | 0.351505000  | 3.686377000  | 1.656827000  |
| 7  | 3.110693000  | -1.679843000 | 1.119546000  |
| 8  | 4.140445000  | -1.769182000 | 1.752531000  |
| 8  | -3.258692000 | -3.067811000 | -1.259467000 |
| 7  | -2.437097000 | -2.206375000 | -0.987760000 |
| 26 | -2.122348000 | -0.852500000 | 0.056204000  |
| 7  | -3.404537000 | -0.689313000 | 1.141597000  |
| 8  | -4.380236000 | -0.324158000 | 1.758081000  |
| 16 | -1.814151000 | 1.068044000  | -1.064358000 |

Complex 14

|    |              |              |              |
|----|--------------|--------------|--------------|
| 26 | 1.925731000  | -0.550685000 | 0.106430000  |
| 26 | -0.029668000 | 1.507804000  | -0.154313000 |
| 16 | 0.014355000  | -0.206404000 | 1.383172000  |
| 16 | 2.000506000  | 1.396074000  | -1.080871000 |
| 8  | 1.993722000  | -2.964136000 | -1.394963000 |
| 8  | 4.229992000  | -1.028747000 | 1.711373000  |
| 8  | -0.243943000 | 4.285159000  | 0.236936000  |
| 7  | 3.239365000  | -0.660254000 | 1.156603000  |
| 7  | 1.796939000  | -1.905693000 | -0.881951000 |
| 7  | -0.185440000 | 3.092922000  | 0.264451000  |
| 16 | -1.796988000 | 1.038064000  | -1.437118000 |
| 26 | -1.884250000 | -0.628414000 | 0.112010000  |
| 7  | -1.832318000 | -2.125519000 | -0.635525000 |
| 8  | -2.017382000 | -3.220083000 | -1.066587000 |
| 7  | -3.230751000 | -0.473123000 | 1.128930000  |
| 8  | -4.250850000 | -0.783249000 | 1.671017000  |

**Figure 7**

TS8

|    |              |              |              |
|----|--------------|--------------|--------------|
| 26 | 2.702047000  | -0.252299000 | 0.424701000  |
| 26 | -1.141585000 | -0.668330000 | -1.065900000 |
| 16 | 0.696513000  | 0.437489000  | -1.293825000 |
| 16 | -0.920151000 | -2.217506000 | 0.392090000  |
| 8  | -1.713727000 | -1.912567000 | -3.503896000 |
| 7  | -1.470174000 | -1.368002000 | -2.481583000 |
| 26 | -2.515564000 | -0.814847000 | 1.083042000  |
| 16 | -2.771274000 | 0.651378000  | -0.573656000 |

|    |              |              |              |
|----|--------------|--------------|--------------|
| 7  | -3.895066000 | -1.673230000 | 1.170781000  |
| 8  | -4.903485000 | -2.212626000 | 1.484445000  |
| 7  | -2.109415000 | -0.073761000 | 2.479600000  |
| 8  | -2.103676000 | 0.316653000  | 3.598641000  |
| 26 | -0.900814000 | 1.859064000  | -0.661466000 |
| 7  | -0.575840000 | 2.537532000  | 0.786709000  |
| 8  | -0.360466000 | 3.317212000  | 1.653435000  |
| 7  | -1.081578000 | 2.944659000  | -1.860788000 |
| 8  | -1.159411000 | 3.916023000  | -2.536682000 |
| 8  | 3.473574000  | -1.764453000 | -1.464123000 |
| 1  | 4.392958000  | -1.646274000 | -1.757626000 |
| 6  | 3.031948000  | -3.120416000 | -1.735098000 |
| 1  | 3.564460000  | -3.826289000 | -1.092923000 |
| 1  | 3.202890000  | -3.349583000 | -2.788798000 |
| 1  | 1.965707000  | -3.131397000 | -1.515401000 |
| 8  | 3.618027000  | 1.657998000  | 0.585628000  |
| 1  | 4.044250000  | 1.970329000  | -0.231906000 |
| 6  | 3.152802000  | 2.802127000  | 1.351465000  |
| 1  | 2.332860000  | 3.296016000  | 0.828654000  |
| 1  | 2.814608000  | 2.404306000  | 2.306490000  |
| 1  | 3.987826000  | 3.488556000  | 1.503501000  |
| 7  | 2.952759000  | -0.714828000 | 2.034826000  |
| 8  | 3.543734000  | -1.136943000 | 2.963865000  |
| 7  | 4.264865000  | -0.552898000 | -0.180087000 |
| 8  | 5.375367000  | -0.949711000 | -0.191303000 |

Complex 15

|    |              |              |              |
|----|--------------|--------------|--------------|
| 26 | -2.457435000 | -1.188486000 | -0.147904000 |
| 26 | 0.950284000  | -0.377829000 | 1.464597000  |
| 16 | -1.326048000 | 0.163646000  | 1.348892000  |
| 16 | 1.547206000  | -2.122859000 | 0.251173000  |
| 8  | 1.750813000  | -1.179762000 | 4.103677000  |
| 7  | 1.374068000  | -0.655608000 | 3.105785000  |
| 26 | 2.457802000  | -0.347470000 | -0.891156000 |
| 16 | 1.936721000  | 1.462889000  | 0.493123000  |
| 7  | 4.146841000  | -0.451774000 | -0.958383000 |
| 8  | 5.250892000  | -0.456451000 | -1.405620000 |
| 7  | 1.765807000  | -0.110029000 | -2.407867000 |
| 8  | 1.550688000  | 0.105921000  | -3.556326000 |
| 26 | -0.328556000 | 1.987488000  | 0.286626000  |
| 7  | -0.843395000 | 2.091287000  | -1.309907000 |
| 8  | -1.327987000 | 2.374594000  | -2.354242000 |
| 7  | -0.636944000 | 3.384224000  | 1.192042000  |
| 8  | -1.025932000 | 4.469756000  | 1.478445000  |
| 8  | -4.340936000 | -0.360991000 | -0.298951000 |
| 1  | -4.858219000 | -0.374157000 | 0.526713000  |
| 6  | -4.568585000 | 0.904023000  | -0.980190000 |
| 1  | -4.154775000 | 1.727704000  | -0.394208000 |
| 1  | -4.055239000 | 0.825372000  | -1.936746000 |
| 1  | -5.640887000 | 1.033980000  | -1.133251000 |
| 7  | -1.858104000 | -1.221332000 | -1.746842000 |

|   |              |              |              |
|---|--------------|--------------|--------------|
| 8 | -1.335686000 | -1.647000000 | -2.720370000 |
| 7 | -2.550706000 | -2.746461000 | 0.534548000  |
| 8 | -2.317216000 | -3.886599000 | 0.746605000  |

TS9

|    |              |              |              |
|----|--------------|--------------|--------------|
| 26 | -2.403955000 | -0.184940000 | 0.539609000  |
| 26 | 1.154458000  | 0.108659000  | 1.222862000  |
| 16 | -0.666680000 | 1.293090000  | 1.163582000  |
| 16 | 0.333609000  | -1.763915000 | 1.370489000  |
| 8  | 2.436872000  | 0.831959000  | 3.584885000  |
| 7  | 1.876310000  | 0.661491000  | 2.558197000  |
| 26 | 1.381341000  | -1.637768000 | -0.562507000 |
| 16 | 2.351236000  | 0.355434000  | -0.533238000 |
| 7  | 2.547977000  | -2.756723000 | -0.617702000 |
| 8  | 3.327680000  | -3.626871000 | -0.820396000 |
| 7  | 0.290057000  | -1.720294000 | -1.776828000 |
| 8  | -0.236013000 | -2.039911000 | -2.787746000 |
| 26 | 0.670246000  | 1.837831000  | -0.566099000 |
| 7  | -0.009393000 | 1.710481000  | -2.030892000 |
| 8  | -0.315466000 | 1.780317000  | -3.181919000 |
| 7  | 1.333653000  | 3.301736000  | -0.299636000 |
| 8  | 1.712122000  | 4.408702000  | -0.491293000 |
| 8  | -2.842735000 | 1.253025000  | -0.896986000 |
| 1  | -2.003522000 | 1.749196000  | -1.024686000 |
| 6  | -3.306766000 | 0.789493000  | -2.182908000 |
| 1  | -2.568393000 | 0.131730000  | -2.649069000 |
| 1  | -4.226424000 | 0.238335000  | -1.988105000 |
| 1  | -3.512992000 | 1.649399000  | -2.827526000 |
| 7  | -2.340859000 | -1.564592000 | -0.317317000 |
| 8  | -2.677225000 | -2.638408000 | -0.712048000 |
| 7  | -3.437148000 | -0.297368000 | 1.767991000  |
| 8  | -4.257387000 | -0.621413000 | 2.568796000  |

Complex 16

|    |              |              |              |
|----|--------------|--------------|--------------|
| 26 | -0.219141000 | 2.035912000  | 0.259261000  |
| 26 | -0.001003000 | -0.001683000 | -1.250782000 |
| 16 | -1.869261000 | 0.827255000  | -0.597418000 |
| 16 | 1.648519000  | 1.203020000  | -0.595311000 |
| 8  | -0.232081000 | 2.245076000  | 3.034757000  |
| 8  | -0.492518000 | 4.701517000  | -0.518020000 |
| 8  | -0.001554000 | -0.004843000 | -4.043228000 |
| 7  | -0.375827000 | 3.537124000  | -0.333485000 |
| 7  | -0.208397000 | 1.963178000  | 1.885319000  |
| 7  | 0.000029000  | -0.004920000 | -2.860487000 |
| 26 | 1.874461000  | -0.829635000 | 0.260773000  |
| 16 | 0.216325000  | -2.030959000 | -0.587476000 |
| 7  | 3.251990000  | -1.441263000 | -0.337793000 |
| 8  | 4.320772000  | -1.917413000 | -0.523082000 |
| 7  | 1.816708000  | -0.803243000 | 1.887329000  |



|    |              |              |              |
|----|--------------|--------------|--------------|
| 8  | 2.081563000  | -0.922022000 | 3.034910000  |
| 26 | -1.657664000 | -1.205127000 | 0.261624000  |
| 7  | -1.602719000 | -1.155614000 | 1.887553000  |
| 8  | -1.834886000 | -1.316583000 | 3.037002000  |
| 7  | -2.877583000 | -2.095279000 | -0.329829000 |
| 8  | -3.825259000 | -2.782615000 | -0.511058000 |

2. Table S1 Charges and spin densities on the most relevant atoms

| Complex | Atom   | Charges on the most relevant atoms | Spin densities on the most relevant atoms |
|---------|--------|------------------------------------|-------------------------------------------|
| 2       | Fe     | 0.914                              | 2.725                                     |
|         | N      | 0.007;0.002                        | -0.501;-0.506                             |
|         | S      | -0.336;-0.347                      | 0.050;0.048                               |
|         | O      | -0.266;-0.269                      | -0.427;-0.429                             |
| 3       | Fe     | 0.913                              | 2.863                                     |
|         | N      | -0.015 ; -0.022                    | -0.551 ; -0.541                           |
|         | S      | -0.308                             | 0.051                                     |
|         | O      | -0.270 ; -0.277                    | -0.455 ; -0.452                           |
|         | Cl     | -0.600                             | 0.070                                     |
| 4       | Fe     | 1.034                              | 2.876                                     |
|         | N      | -0.055 ; -0.003                    | -0.533 ; -0.517                           |
|         | S      | -0.303                             | 0.052                                     |
|         | O      | -0.236 ; -0.250                    | -0.477 ; -0.451                           |
|         | O(met) | -0.687                             | 0.035                                     |
| 5       | Fe     | 1.051                              | 3.038                                     |
|         | N      | -0.036 ; -0.045                    | -0.584 ; -0.587                           |
|         | Cl     | -0.614                             | 0.074                                     |
|         | O      | -0.263 ; -0.261                    | -0.489 ; -0.482                           |
|         | O(met) | -0.692                             | 0.031                                     |
| 6       | Fe     | 1.101                              | 2.967                                     |
|         | N      | -0.056 ; -0.049                    | -0.510 ; -0.504                           |
|         | O      | -0.170 ; -0.174                    | -0.511 ; -0.510                           |
|         | O(met) | -0.694                             | 0.024                                     |
| TS1     | Fe     | 0.931                              | 2.749                                     |
|         | N      | -0.039 ; -0.017                    | -0.503 ; -0.476                           |
|         | S      | -0.335 ; 0.144                     | 0.001 ; 0.072                             |
|         | O      | -0.250 ; -0.222                    | -0.451 ; -0.447                           |
|         | O(met) | -0.678                             | 0.024                                     |

|     |        |                                      |                                    |
|-----|--------|--------------------------------------|------------------------------------|
| 7   | Fe     | 0.915                                | 2.770                              |
|     | N      | -0.019 ; -0.080                      | -0.474 ; -0.513                    |
|     | S      | 0.226 ; -0.329                       | 0.086 ; 0.003                      |
|     | O      | -0.224 ; -0.225                      | -0.472 ; -0.449                    |
|     | O(met) | -0.676                               | 0.029                              |
| TS2 | Fe     | 0.894                                | 2.749                              |
|     | N      | -0.019 ; -0.074                      | -0.514 ; -0.478                    |
|     | S      | 0.248 ; -0.493                       | 0.001 ; 0.124                      |
|     | O      | -0.231 ; -0.247                      | -0.443 ; -0.460                    |
|     | O(met) | -0.674                               | 0.028                              |
| 8   | Fe     | 0.825                                | 2.979                              |
|     | N      | -0.163 ; -0.095                      | -0.714 ;                           |
|     | S      | -1.071                               | 0.263                              |
|     | O      | -0.333 ; -0.307                      | -0.526 ; -0.454                    |
|     | O(met) | -0.669                               | 0.028                              |
| TS3 | Fe     | 0.546 ; 0.607                        |                                    |
|     | N      | -0.080 ; -0.090 ; -0.064 ;<br>-0.087 |                                    |
|     | S      | -0.778 ; -0.617                      |                                    |
|     | O      | -0.452 ; -0.358 ; -0.364 ;<br>-0.362 |                                    |
|     | O(met) | -0.602 ; -0.581                      |                                    |
| 10  | Fe     | 0.772 ; 0.915                        | 2.935 ; -2.916                     |
|     | N      | -0.154 ; -0.067 ; -0.068 ;<br>-0.109 | -0.731 ; -0.563 ; 0.572 ;<br>0.653 |
|     | S      | -0.925 ; -1.085                      | 0.157 ;                            |
|     | O      | -0.320 ; -0.301 ; -0.321 ;<br>-0.348 | -0.517 ; -0.412 ; 0.447 ;<br>0.498 |
|     | O(met) | -0.698                               | -0.041                             |
| TS4 | Fe     | 0.477 ; 0.344                        |                                    |
|     | N      | -0.172 ; -0.233 ; -0.122 ;<br>-0.142 |                                    |
|     | S      | -1.067 ; -1.065                      |                                    |
|     | O      | -0.009 ; -0.033 ; -0.028 ;<br>-0.034 |                                    |
|     | O(met) | -0.105                               |                                    |
| 11  | Fe     | 0.694 ; 0.694                        | 2.754 ; -2.754                     |
|     | N      | -0.026 ; -0.026 ; -0.117 ;<br>-0.117 | -0.668 ; -0.540 ; 0.668 ;<br>0.539 |

|     |        |                                                        |                                                         |
|-----|--------|--------------------------------------------------------|---------------------------------------------------------|
|     | S      | -0.870 ; -0.870                                        | 0 ; 0                                                   |
|     | O      | -0.321 ; -0.321 ; -0.359 ;<br>-0.359                   | -0.403 ; -0.483 ; 0.483 ;<br>0.402                      |
| TS5 | Fe     | 0.544 ; 0.552 ; 0.724                                  | -0.079 ; -0.093 ; -0.045                                |
|     | N      | 0.015 ; -0.032 ; 0.018 ;<br>-0.029 ; -0.051 ; -0.069   | 0.047 ; 0.046 ; 0.014 ;<br>0.019 ; 0.227 ; 0.320        |
|     | S      | -0.665 ; -0.619 ; -0.907                               | 0.021 ; -0.002 ; 0.095                                  |
|     | O      | -0.396 ; -0.448 ; -0.397 ;<br>-0.449 ; -0.347 ; -0.373 | 0.025 ; 0.010 ; 0.150 ;<br>0.206 ; 0.033 ; 0.130        |
|     | O(met) | -0.625                                                 | 0.002                                                   |
| 12  | Fe     | 0.664 ; 0.598 ; 0.560                                  | -0.376 ; -0.033 ; 0.160                                 |
|     | N      | -0.060 ; -0.103 ; -0.028 ;<br>0.007 ; 0.029 ; -0.056   | -0.041 ; 0.050 ; -0.065 ;<br>-0.037 ; 0.336 ; 0.384     |
|     | S      | -0.640 ; -0.698 ; -0.810                               | 0.182 ; 0.045 ; 0.001                                   |
|     | O      | -0.407 ; -0.355 ; -0.384 ;<br>-0.397 ; -0.383 ; -0.433 | -0.029 ; -0.025 ; 0.029 ;<br>-0.039 ; 0.209 ; 0.250     |
| TS6 | Fe     | 0.779 ; 0.771 ; 0.811                                  | 2.936 ; -0.831 ; 0.755                                  |
|     | N      | -0.142 ; -0.066 ; -0.057 ;<br>-0.029 ; -0.059 ; -0.117 | -0.505 ; -0.508 ; 0.429 ;<br>0.611 ; -0.672 ; -0.586    |
|     | S      | -0.912 ; -0.739 ; -0.883                               | 0.259 ; 0.071 ; 0.041                                   |
|     | O      | -0.362 ; -0.372 ; -0.378<br>; -0.413 ; -0.349 ; -0.391 | -0.253 ; -0.366 ; -0.409 ; -<br>0.419 ; -0.429 ; -0.611 |
| 13  | Fe     | 0.727 ; 0.747 ; 0.581                                  | 2.747 ; -1.247 ; -2.648                                 |
|     | S      | -0.783 ; -0.784 ; -0.732                               | 0.142 ; -0.120 ; -0.017                                 |
|     | N      | -0.126 ; -0.053 ; -0.052 ;<br>-0.054 ; -0.030 ; -0.071 | 0.726 ; 0.653 ; 0.717 ;<br>0.483 ; -0.520 ; -0.736      |
|     | O      | -0.382 ; -0.389 ; -0.416 ;<br>-0.397 ; -0.357 ; -0.360 | 0.442 ; 0.335 ; -0.456 ; -<br>0.369 ; 0.446 ; 0.423     |
| TS7 | Fe     | 0.756 ; 0.762 ; 0.604                                  | 2.693 ; 2.752 ; 1.076                                   |
|     | S      | -0.737 ; -0.859 ; -0.769                               | 0.137 ; 0.186 ; 0.108                                   |
|     | N      | -0.065 ; -0.106 ; -0.116 ;<br>-0.062 ; 0.031 ; -0.062  | -0.563 ; -0.677 ; -0.659 ;<br>-0.693 ; -0.242 ; -0.987  |
|     | O      | -0.424, -0.381 ; -0.384 ;<br>-0.419 ; -0.431 ; -0.341  | -0.376 ; -0.440 ; -0.446 ;<br>-0.380 ; -0.157 ; -0.419  |
| 14  | Fe     | 0.772 ; 0.776 ; 0.515                                  | 2.597 ; 2.601 ; -1.508                                  |
|     | S      | -0.763 ; -0.769 ; -0.752                               | 0.165 ; 0.078 ; 0.178                                   |
|     | N      | 0.008 ; -0.049 ; -0.017 ;<br>-0.029 ; -0.033           | 0.374 ; -0.561 ; -0.503 ;<br>-0.522 ; -0.544            |
|     | O      | -0.348 ; -0.322 ; -0.327<br>; -0.330 ; -0.348          | 0.277 ; 0.427 ; 0.388 ;<br>0.402 ; 0.416                |
| TS8 | Fe     | <i>-0.079 ; 0.495 ; 0.184</i>                          |                                                         |

|     |        |                                                                             |                                                                              |
|-----|--------|-----------------------------------------------------------------------------|------------------------------------------------------------------------------|
|     |        | <i>;0.363 ;</i>                                                             |                                                                              |
|     | S      | <i>0.051 ; -0.517 ; 0.000 ;</i>                                             |                                                                              |
|     | N      | <i>-0.625 ; -0.509 ; -0.203 ;<br/>-0.175 ; -0.645 ; -0.314 ;<br/>-0.137</i> |                                                                              |
|     | O      | <i>0.130 ; 0.073 ; 0.023<br/>;0.072 ; 0.147 ; 0.101 ;<br/>0.060 ;</i>       |                                                                              |
|     | O(met) | <i>-0.163 ; -0.204</i>                                                      |                                                                              |
| 15  | Fe     | <i>1.002 ; 0.664 ; 0.661 ;<br/>0.527</i>                                    | <i>0.413 ; 0.586 ; -0.103 ;<br/>0.250</i>                                    |
|     | N      | <i>-0.060 ; -0.038 ; 0.005 ;<br/>0.003 ; ; 0.019 ; 0.007 ;<br/>0.028</i>    | <i>0.106 ; -0.118 ; -0.088 ;<br/>0.043 ; -0.058 ; -0.244 ;<br/>-0.205</i>    |
|     | S      | <i>-0.539 ; -0.531 ; -0.725</i>                                             | <i>0.007 ; 0.103 ; -0.033</i>                                                |
|     | O      | <i>-0.282 ; -0.280 ; -0.300 ;<br/>-0.325 ; -0.335 ; -0.316 ;<br/>-0.324</i> | <i>0.068 ; -0.090 ; -0.069 ;<br/>-0.034 ; -0.044 ; -0.211 ;<br/>-0.175</i>   |
|     | O(met) | <i>-0.663</i>                                                               | <i>-0.002</i>                                                                |
| TS9 | Fe     | <i>0.943 ; 0.489 ; 0.631 ;<br/>0.555</i>                                    | <i>2.233 ; -2.063 ; 1.577 ; -<br/>0.598</i>                                  |
|     | N      | <i>0.057 ; 0.033 ; 0.011 ; -<br/>0.042 ; 0.027 ; -0.007 ;<br/>0.006</i>     | <i>0.282 ; -0.272 ; -0.295 ;<br/>0.221 ; 0.185 ; -0.398<br/>0.237</i>        |
|     | S      | <i>-0.624 ; -0.493 ; -0.427</i>                                             | <i>0.042 ; -0.006 ; 0.019 ;</i>                                              |
|     | O      | <i>-0.322 ; -0.346 ; -0.321<br/>; -0.351 ; -0.325 ;<br/>-0.281 ; -0.318</i> | <i>-0.220 ;<br/>-0.233 ; 0.180 ; 0.153 ; ; -<br/>0.384 ; -0.339 ; -0.348</i> |
|     | O(met) | <i>-0.672</i>                                                               | <i>0.023</i>                                                                 |
| 16  | Fe     | <i>0.629 ; 0.329 ; 0.632 ;<br/>0.599</i>                                    | <i>-1.348 ; -0.265 ; 1.366 ;<br/>0.328</i>                                   |
|     | N      | <i>0.028 ; 0.033 ; 0.086 ;<br/>0.028 ; 0.033 ; 0.039 ;<br/>0.035</i>        | <i>-0.037 ; -0.040 ; -0.250 ;<br/>-0.238 ; 0.018 ; 0.243 ;<br/>0.258</i>     |
|     | O      | <i>-0.310 ; -0.336 ; -0.327 ;<br/>-0.335 ; -0.310 ; -0.315 ;<br/>-0.338</i> | <i>0.211 ; 0.200 ; -0.033 ; -<br/>0.030 ; -0.205 ; -0.197 ;<br/>0.017</i>    |
|     | S      | <i>-0.392 ; -0.411 ; -0.398</i>                                             | <i>-0.006 ; 0.003 ; 0.004</i>                                                |

### 3. Input files for these calculations (the same for all stable structures)

%NPROC=12

%Mem=5000MB

%chk=etmks

```

# utpssh/6-31G* iop(5/13=1) scf=qc guess=mix freq
test vshift=300
--Link1--
%NPROC=12
%Mem=5000MB
%chk=etmks
# utpssh/6-31G* iop(5/13=1) scf=(conver=5,maxcycle=1500) opt=(gdiis,readfc) scf=qc freq
guess=(read,mix) geom=check scrf=(pcm,solvent=methanol) test vshift=300
--Link1--
%NPROC=12
%Mem=5000MB
%chk=etmks
# utpssh/6-311++G** iop(5/13=1) scf=(conver=6,maxcycle=150) guess=(read,mix) geom=check
scrf=(pcm,solvent=methanol) test vshift=300

```

TS: (the same for all TS)

```

%NPROC=12
%Mem=5000MB
%chk=etmks
# utpssh/6-31G* iop(5/13=1) Opt(TS,CalcFC,NoEigenTest) scf=qc guess=(r
ead,mix) scrf=(pcm,solvent=methanol) geom=check Freq Test
--Link1--
%NPROC=12
%Mem=5000MB
%chk=etmks
# utpssh/6-311++G** iop(5/13=1) scf=(conver=6,maxcycle=150) guess=(rea
d,mix) geom=check scrf=(pcm,solvent=methanol) test vshift=300

```

```

%Nproc=8
%Mem=7000MB
# utpssh/6-31G* IRC(CalcFC,MaxPoints=500,Recorrect=Never) FREQ
scf=(VSHIFT=300,NoIncFock,MAXCYC=200,Tight,NoVarAcc) NOSYMM
IOP(5/13=1,5/36=1,8/11=1)

```
